# Supplementary material for: Genome-wide association study in frontal fibrosing alopecia identifies four susceptibility loci including HLA-B*07:02
Source: PubMed Central journal article supplement (PMC6408457; doi:10.1038/s41467-019-09117-w), 2019-03-08
Supplement: 41467_2019_9117_MOESM1_ESM.pdf [file 41467_2019_9117_MOESM1_ESM.pdf]

## Supplementary Information

Genome-wide association study in frontal fibrosing alopecia identifies four susceptibility loci and implicates *HLA-B\*07:02* as the major genetic risk factor

Tziotzios, C., et al.

## Supplementary Note 1

Frontal fibrosing alopecia (FFA) is a rare dermatological disorder associated with scarring, inflammation and irreversible hair loss affecting almost exclusively women of postmenopausal age.<sup>1</sup> Despite the paucity of epidemiologic estimates, it is widely accepted that the prevalence of FFA has been increasing worldwide since first reported in 1994 and it now represents the most common scarring alopecia in dermatology consultations, often attracting the descriptor epidemic for hair clinics.<sup>2</sup> Affected individuals report arm and leg hair loss to predate the eyebrow, facial and scalp involvement, with the latter becoming clinically evident and coinciding with oestrogen decline, whether menopausal or iatrogenic.<sup>1</sup> Oestrogen decline seems to be a key biochemical event in disease pathogenesis, as it heralds disease progression, possibly via immunomodulatory and profibrotic effects.<sup>1</sup> Segregation of FFA in first degree relatives and concordance in monozygotic twins provided a foundation for the notion that there is a genetic basis underlying disease pathogenesis, while the rapid increase in incidence was thought to be associated with (recent and female-specific) environmental triggers.<sup>1</sup> Yet, questionnaire-based studies interrogating topical cosmetic products, which are mostly not systemically absorbed, have failed to identify culprits with statistical significance.<sup>3</sup>

Male FFA is extremely rare: in our own cohort of 1, 440 cases, only 26 male cases were identified representing 1.8% of the total, which is in keeping with the fact that cases or small case series are rarely reported.<sup>4,5</sup> Hormonal aberrations, notably hypogonadism, have been thought to be associated with the disease, in line with published case series.<sup>4, 5</sup> Having considered the small sample size of male cases and the paucity of sufficient clinical phenotyping, biochemical and genetic data, we have focused on female patients, although it should be acknowledged that male disease does warrant separate study.

## Supplementary figures

**Supplementary Figure 1** Histological evaluation of clinically normal parietal skin from each healthy control (haematoxylin-eosin stain)

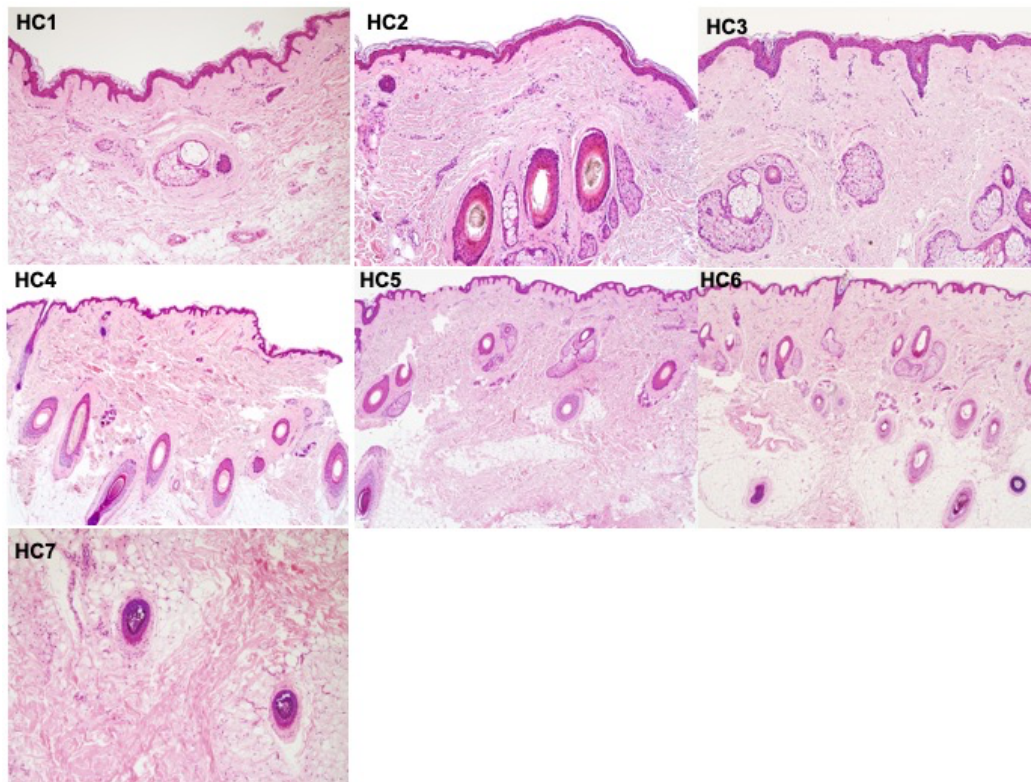

**Supplementary Figure 2** Bioinformatic analysis workflow from sequencer output to differential gene expression

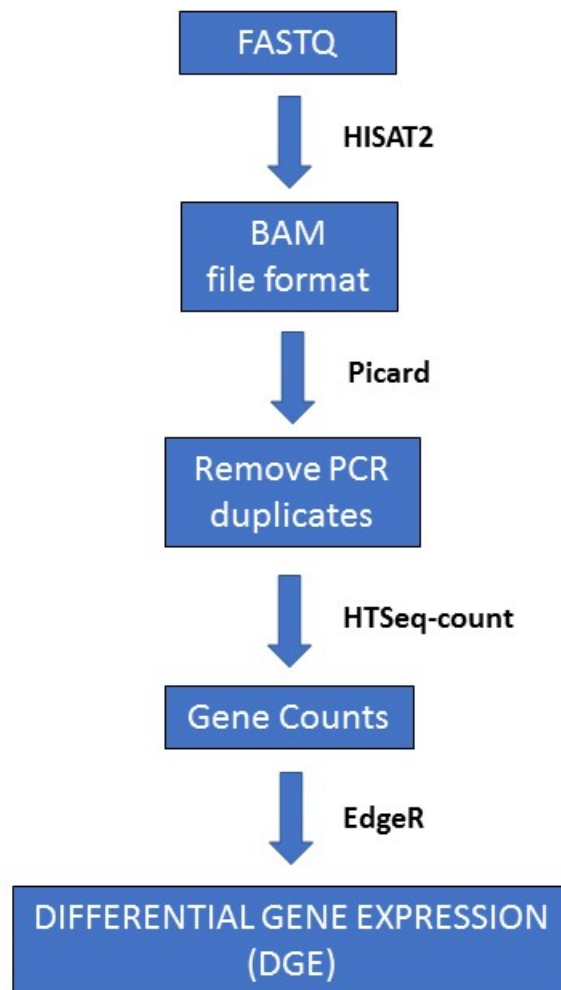

**Supplementary Figure 3** Quantile-Quantile (Q-Q) plots of GWA results for UK cohort (A), Spanish cohort (B) and Meta-analysis (C)

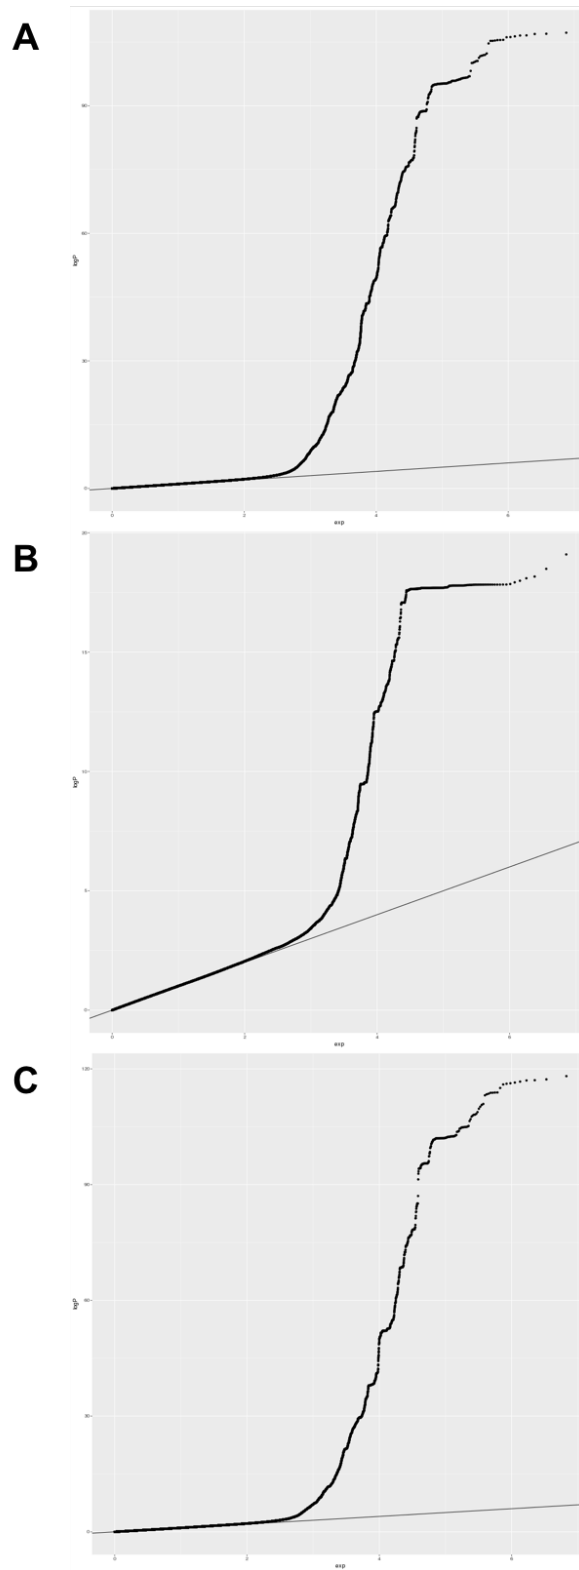

**Supplementary Figure 4** Stepwise conditional testing at HLA locus

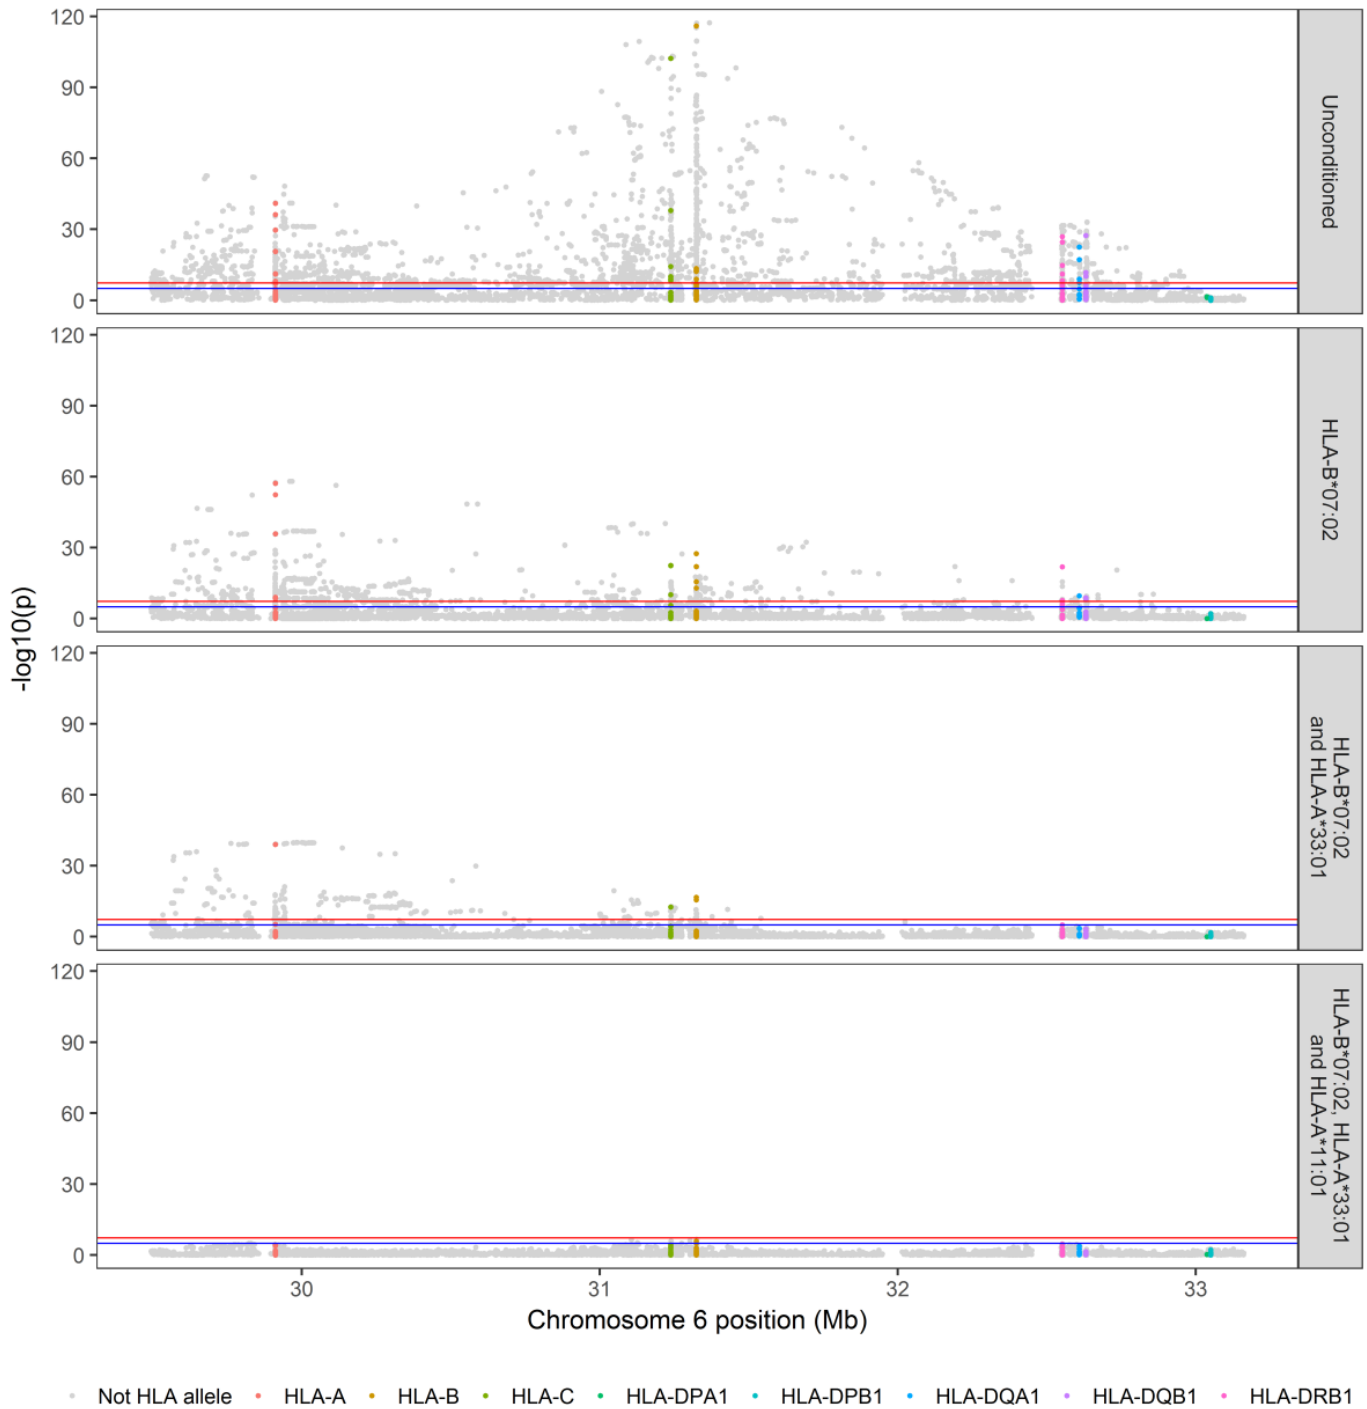

**Supplementary Figure 5** Colocalisation of the FFA association signal (regional plot in top panel) with *SEMA4B* eQTL in sun-exposed skin from the GTEx database (bottom panel)

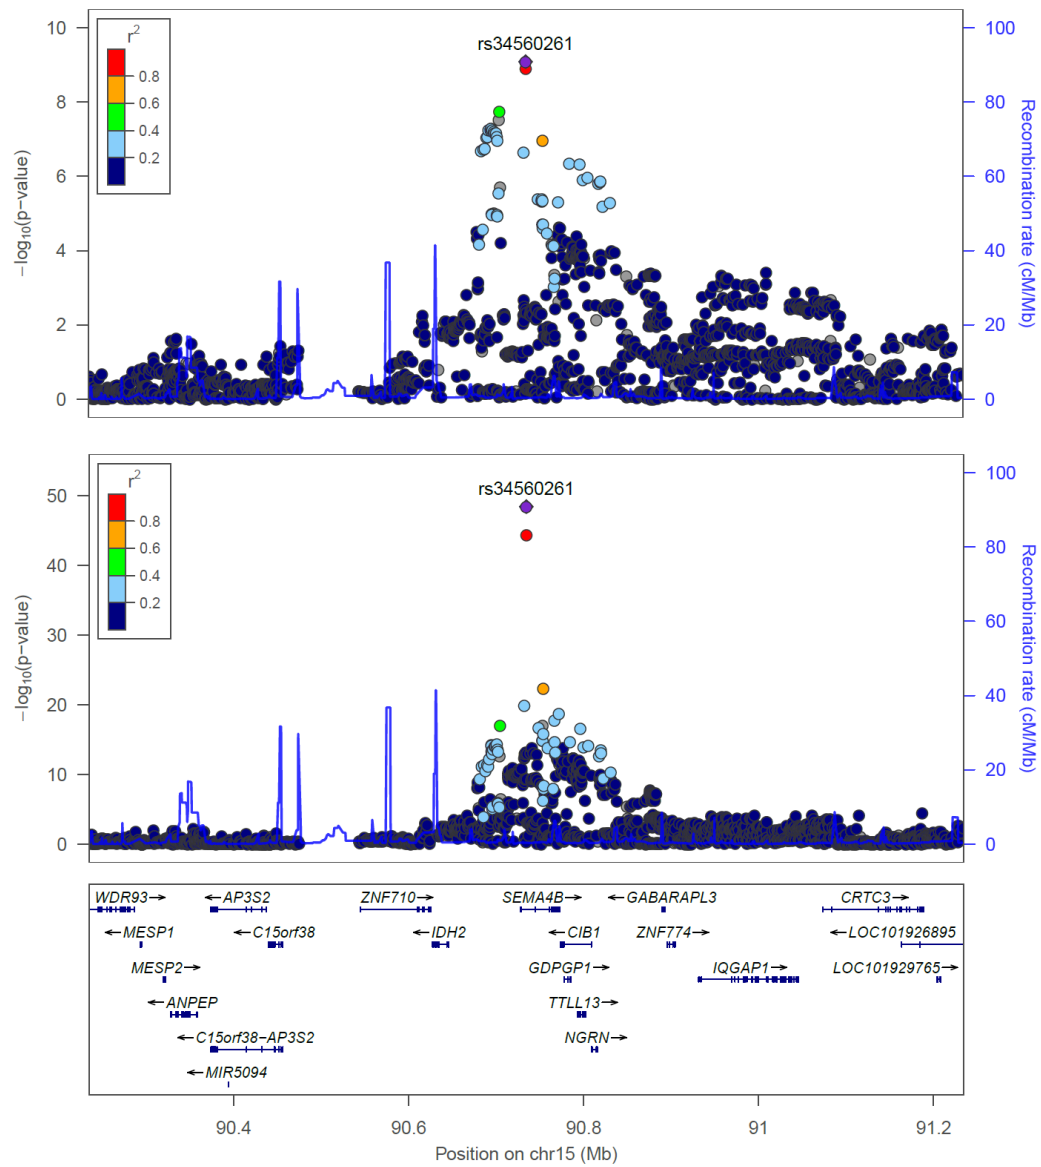

**Supplementary Figure 6** HeatMap with two-way hierarchical clustering illustrating metabolomic differences between cases and controls for top 30 metabolites; each coloured cell on the map corresponds to a concentration value with samples in rows and compounds in columns

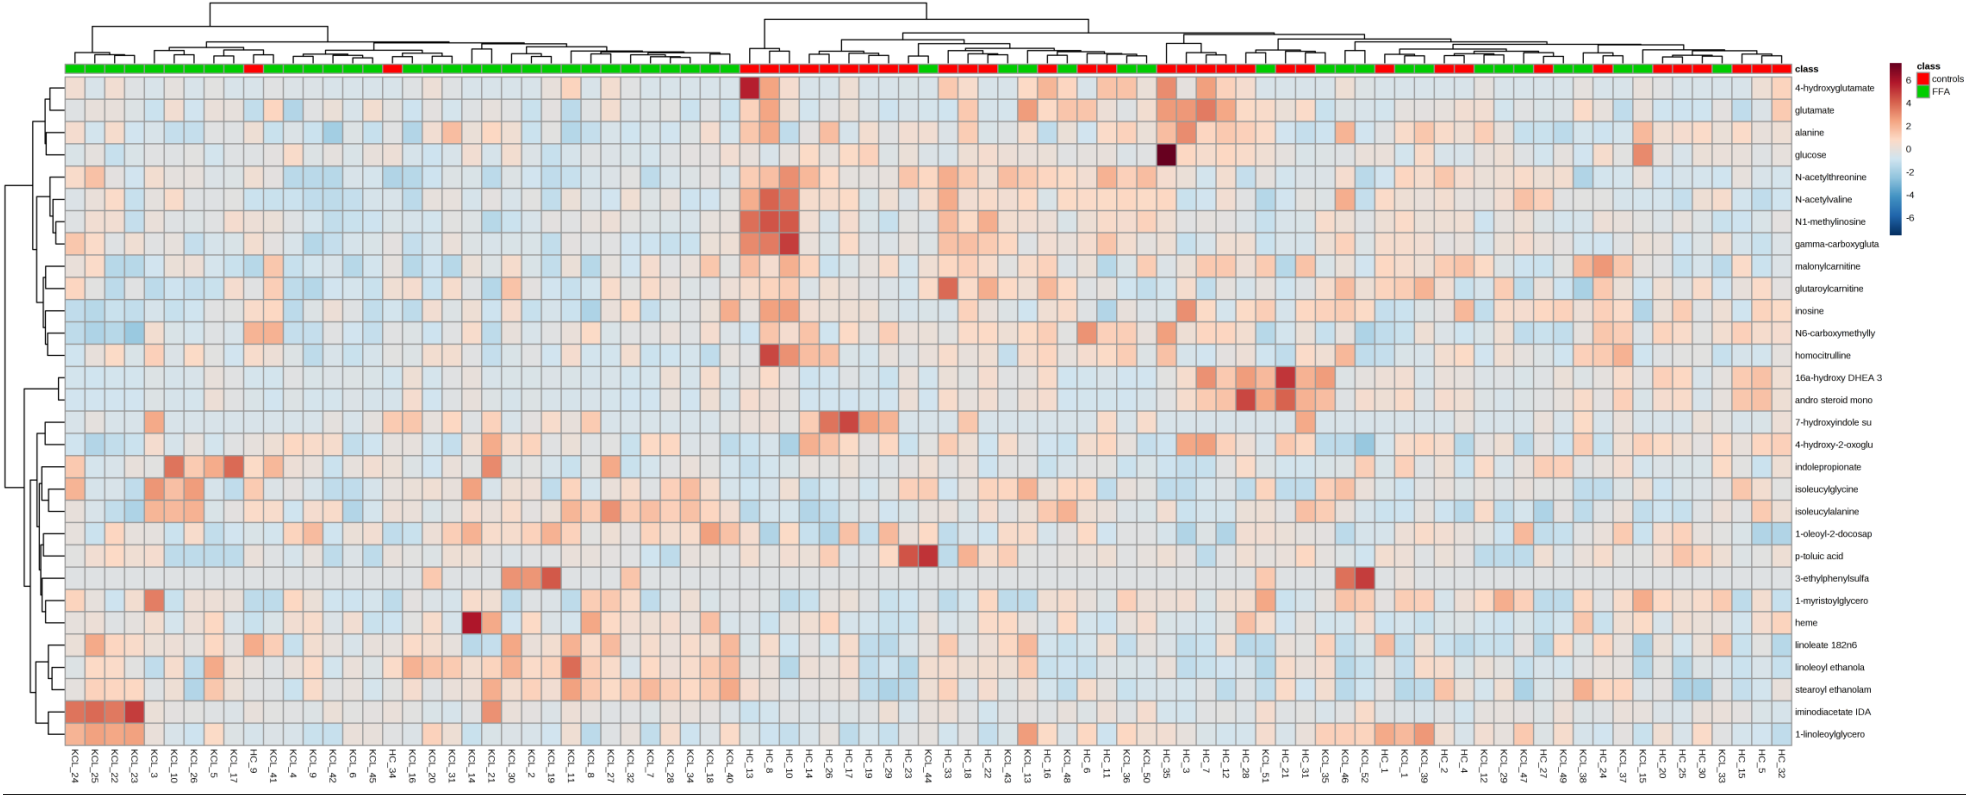



**Supplementary Figure 7** Two-way hierarchical clustering RNAseq HeatMap generated based on the top 120 differentially expressed genes of 14 human scalp tissue samples (7 healthy controls, *HC*; and 7 FFA cases, *Case*); up- and down-regulated genes are depicted in yellow and green and red, respectively, and colour intensity corresponds to magnitude

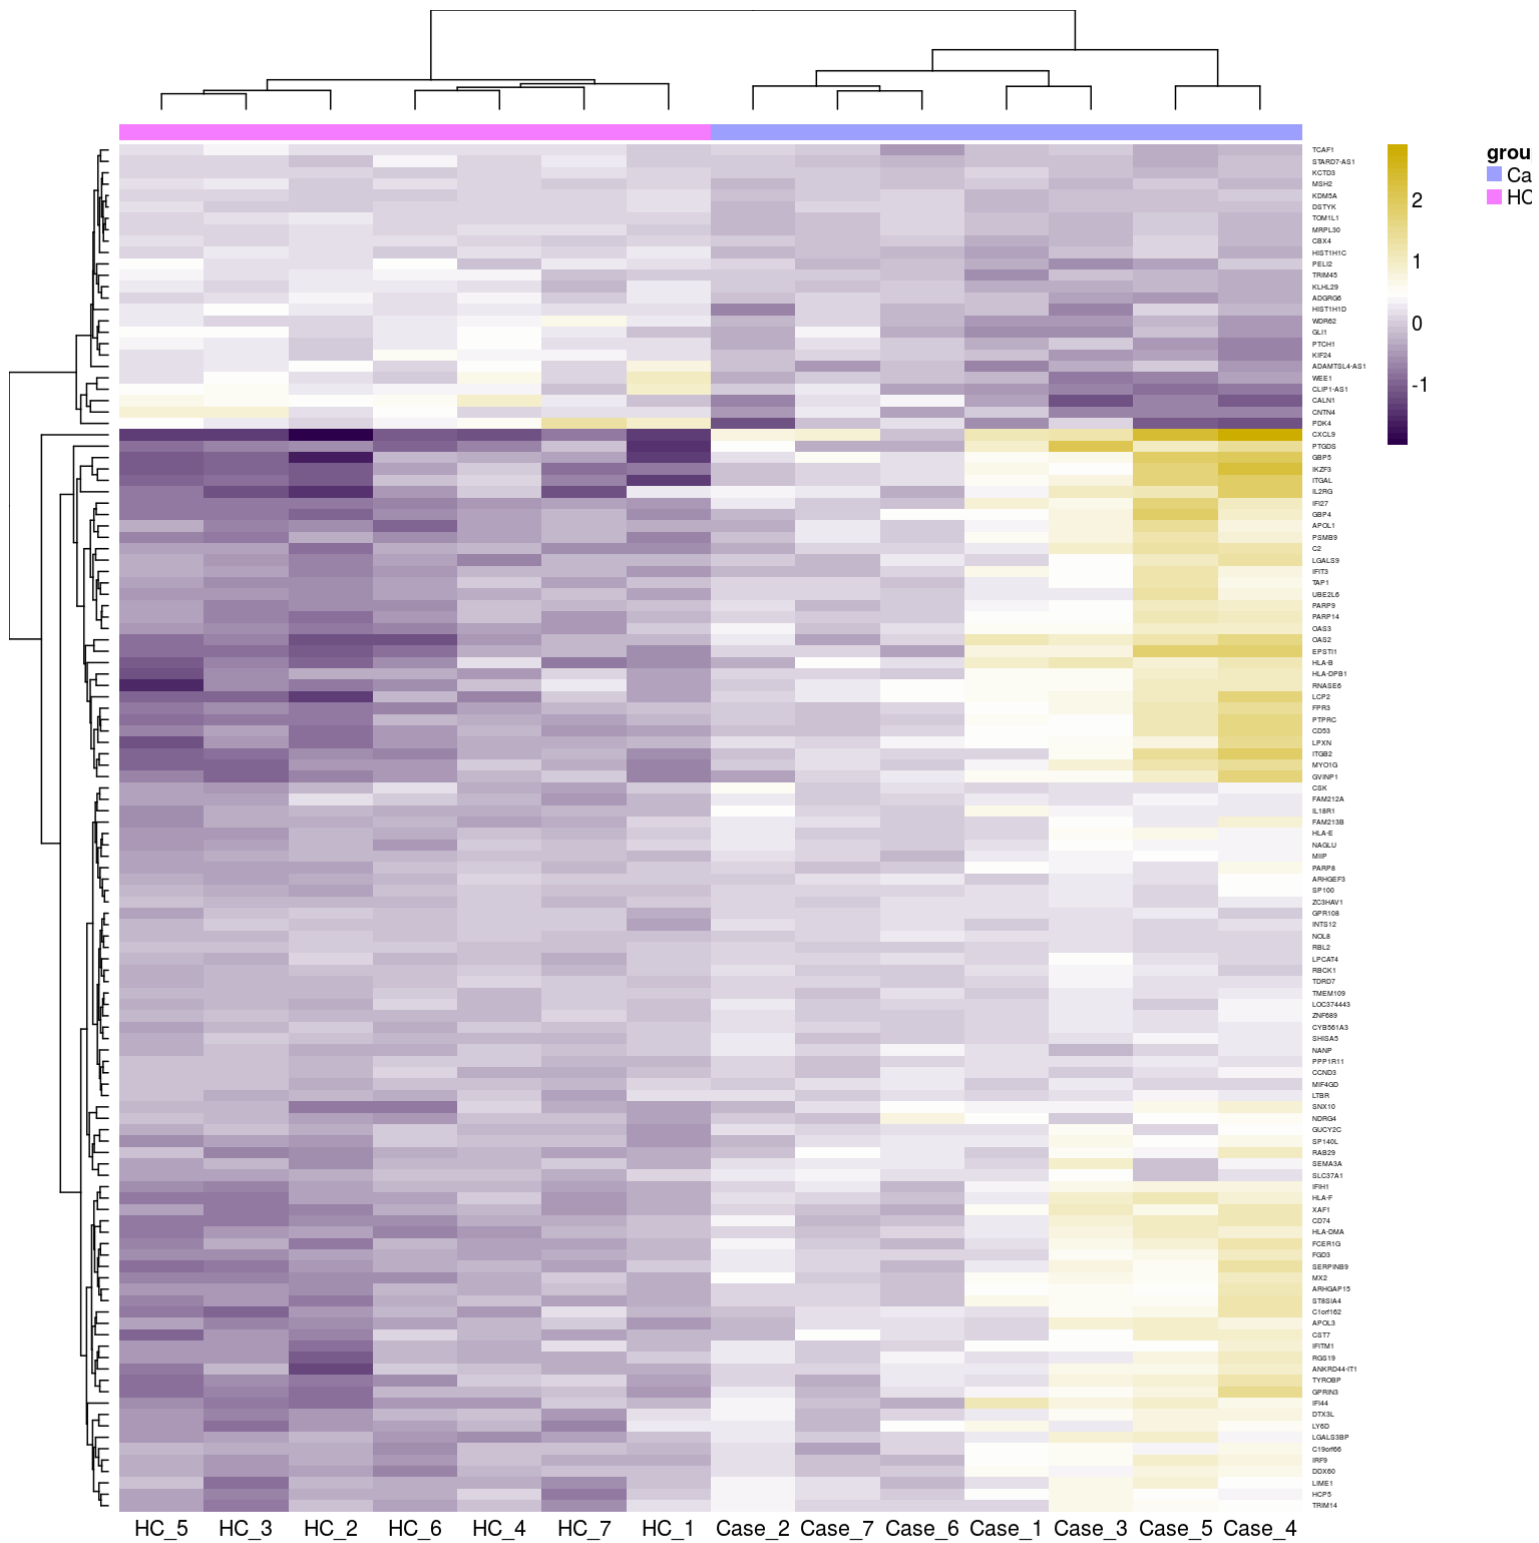

## Supplementary tables

**Supplementary Table 1** Inclusion criteria for transcriptomic analysis

|                                                                                                     |
|-----------------------------------------------------------------------------------------------------|
| <b>Inclusion criteria</b>                                                                           |
| Gender: female                                                                                      |
| Ethnicity: Caucasian                                                                                |
| Age: >51 years                                                                                      |
| Clinical and histological evidence of active lichenoid inflammation (cases)                         |
| Clinical and histological evidence of absence of lichenoid inflammation (controls)                  |
| Immunosuppressant and anti-inflammatory treatment-(topical and systemic) naïve (cases and controls) |
| Absence of concomitant dermatosis in clinical history (cases)                                       |
| Absence of any dermatosis in clinical history (controls)                                            |

**Supplementary Table 2** Population confounding bias metrics for each study

|                                      | <b>UK cohort</b> | <b>Spanish cohort</b> | <b>Meta-analysis</b> |
|--------------------------------------|------------------|-----------------------|----------------------|
| $\lambda_{GC} (MAF>0.05)$            | 1.03             | 1.03                  | 1.03                 |
| <b>LD score regression intercept</b> | 1.005            | 1.013                 | 1.006                |

**Supplementary Table 3** Suggestive significant loci (Meta-analysis)

| CHR | SNP ID      | RA | PA | Position (hg19) | RAF <sub>Cases</sub> | RAF <sub>Controls</sub> | UK               |                       | Spanish             |      | Meta-analysis    |                       | P <sub>Het</sub> |
|-----|-------------|----|----|-----------------|----------------------|-------------------------|------------------|-----------------------|---------------------|------|------------------|-----------------------|------------------|
|     |             |    |    |                 |                      |                         | OR (95% CI)      | P                     | OR (95% CI)         | P    | OR (95% CI)      | P                     |                  |
| 10  | rs117687547 | T  | C  | 12, 504, 313    | 0.049                | 0.031                   | 1.83 (1.41-2.40) | 8.11x10 <sup>-6</sup> | 1.68 (0.57-4.97)    | 0.34 | 1.83 (1.41-2.36) | 5.14x10 <sup>-6</sup> | 0.88             |
| 10  | rs112198986 | T  | C  | 24, 576, 259    | 0.056                | 0.037                   | 1.94 (1.49-2.52) | 7.40x10 <sup>-7</sup> | 0.92 (0.38-2.21)    | 0.85 | 1.82 (1.42-2.34) | 2.75x10 <sup>-6</sup> | 0.11             |
| 12  | rs111463574 | C  | T  | 95, 399, 358    | 0.949                | 0.915                   | 1.69 (1.33-2.14) | 1.52x10 <sup>-5</sup> | 1.93 (1.11-3.36)    | 0.02 | 1.72 (1.38-2.14) | 1.06x10 <sup>-6</sup> | 0.66             |
| 13  | rs10507508  | G  | A  | 42, 969, 782    | 0.069                | 0.044                   | 1.62 (1.29-2.03) | 3.05x10 <sup>-5</sup> | 2.16 (1.08-4.34)    | 0.03 | 1.66 (1.34-2.06) | 3.55x10 <sup>-6</sup> | 0.44             |
| 16  | rs6540122   | T  | C  | 87, 991, 361    | 0.199                | 0.160                   | 1.39 (1.20-1.60) | 5.74x10 <sup>-6</sup> | 1.12 (0.81-1.56)    | 0.49 | 1.34 (1.18-1.53) | 9.06x10 <sup>-6</sup> | 0.25             |
| 17  | rs8065764   | C  | T  | 21, 006, 462    | 0.916                | 0.877                   | 1.60 (1.32-1.95) | 2.49x10 <sup>-6</sup> | 1.36 (0.86-2.14)    | 0.19 | 1.56 (1.30-1.87) | 1.27x10 <sup>-6</sup> | 0.51             |
| 17  | rs12951836  | G  | A  | 28, 410, 277    | 0.573                | 0.507                   | 1.26 (1.13-1.41) | 4.38x10 <sup>-5</sup> | 1.38 (1.07-1.79)    | 0.01 | 1.28 (1.15-1.41) | 2.44x10 <sup>-6</sup> | 0.51             |
| 17  | rs112659862 | C  | T  | 71, 290, 983    | 0.015                | 0.005                   | 3.26 (1.86-5.70) | 3.57x10 <sup>-5</sup> | 16.85 (2.01-141.52) | 0.01 | 3.62 (2.11-6.22) | 3.17x10 <sup>-6</sup> | 0.14             |
| 19  | rs79459566  | T  | C  | 13, 320, 504    | 0.062                | 0.040                   | 1.82 (1.43-2.31) | 1.17x10 <sup>-6</sup> | 0.92 (0.43-2.00)    | 0.84 | 1.71 (1.36-2.15) | 4.66x10 <sup>-6</sup> | 0.10             |
| 2   | rs13032164  | C  | G  | 151, 760, 452   | 0.872                | 0.836                   | 1.43 (1.21-1.68) | 2.73x10 <sup>-5</sup> | 1.38 (0.95-2.00)    | 0.09 | 1.42 (1.22-1.65) | 6.05x10 <sup>-6</sup> | 0.88             |
| 2   | rs78504246  | A  | G  | 213, 746, 962   | 0.013                | 0.005                   | 3.52 (1.95-6.34) | 2.89x10 <sup>-5</sup> | 4.03 (0.70-23.09)   | 0.12 | 3.57 (2.04-6.23) | 8.12x10 <sup>-6</sup> | 0.89             |
| 2   | rs6731286   | T  | A  | 62, 839, 819    | 0.714                | 0.658                   | 1.32 (1.17-1.49) | 6.05x10 <sup>-6</sup> | 1.28 (0.97-1.70)    | 0.08 | 1.32 (1.18-1.47) | 1.24x10 <sup>-6</sup> | 0.85             |
| 3   | rs13078360  | A  | G  | 127, 074, 825   | 0.245                | 0.200                   | 1.33 (1.16-1.52) | 3.18x10 <sup>-5</sup> | 1.50 (1.09-2.07)    | 0.01 | 1.35 (1.20-1.53) | 1.67x10 <sup>-6</sup> | 0.49             |
| 3   | rs116806118 | T  | A  | 23, 165, 701    | 0.014                | 0.005                   | 3.66 (2.03-6.60) | 1.52x10 <sup>-5</sup> | 2.41 (0.80-7.27)    | 0.12 | 3.34 (1.99-5.61) | 5.34x10 <sup>-6</sup> | 0.51             |
| 3   | rs1461070   | A  | G  | 30, 741, 506    | 0.031                | 0.017                   | 2.15 (1.53-      | 8.23x10 <sup>-6</sup> | 2.26 (0.88-         | 0.09 | 2.16 (1.57-      | 1.84x10 <sup>-6</sup> | 0.92             |

|   |             |   |   |             |        |       | 3.00)            |                       | 5.80)             |       | 2.96)            |                       |      |
|---|-------------|---|---|-------------|--------|-------|------------------|-----------------------|-------------------|-------|------------------|-----------------------|------|
| 3 | rs114108912 | C | G | 74,464,791  | 0.023  | 0.010 | 2.47 (1.61-3.79) | $8.2 \times 10^{-5}$  | 2.61 (0.81-8.41)  | 0.11  | 2.49 (1.67-3.72) | $8.29 \times 10^{-6}$ | 0.93 |
| 4 | rs183175    | C | G | 5,428,385   | 0.703  | 0.646 | 1.34 (1.19-1.52) | $2.32 \times 10^{-6}$ | 1.03 (0.77-1.37)  | 0.84  | 1.29 (1.15-1.44) | $9.61 \times 10^{-6}$ | 0.10 |
| 5 | rs73062921  | A | T | 16,859,464  | 0.148  | 0.113 | 1.37 (1.16-1.62) | 0.00017               | 1.63 (1.11-2.39)  | 0.01  | 1.41 (1.21-1.64) | $8.84 \times 10^{-6}$ | 0.42 |
| 5 | rs10045403  | G | A | 96,147,733  | 0.324  | 0.266 | 1.28 (1.14-1.45) | $3.49 \times 10^{-5}$ | 1.65 (1.22-2.22)  | 0.001 | 1.33 (1.19-1.48) | $4.15 \times 10^{-7}$ | 0.13 |
| 6 | rs148661203 | T | C | 10,220,442  | 0.017  | 0.007 | 2.82 (1.69-4.70) | $7.12 \times 10^{-5}$ | 4.17 (1.05-16.49) | 0.04  | 2.96 (1.83-4.78) | $9.31 \times 10^{-6}$ | 0.60 |
| 6 | rs34097647  | T | C | 151,430,073 | 0.2415 | 0.197 | 1.33 (1.16-1.52) | $2.99 \times 10^{-5}$ | 1.58 (1.13-2.22)  | 0.007 | 1.36 (1.20-1.55) | $1.08 \times 10^{-6}$ | 0.35 |
| 6 | rs142366299 | T | C | 52,179,367  | 0.025  | 0.012 | 2.62 (1.71-4.01) | $8.63 \times 10^{-6}$ | 1.65 (0.77-3.50)  | 0.20  | 2.34 (1.62-3.40) | $6.42 \times 10^{-6}$ | 0.29 |
| 7 | rs2021162   | G | A | 126,528,455 | 0.326  | 0.276 | 1.30 (1.16-1.47) | $1.47 \times 10^{-5}$ | 1.20 (0.89-1.60)  | 0.23  | 1.29 (1.15-1.44) | $7.98 \times 10^{-6}$ | 0.59 |
| 7 | rs112115472 | C | T | 13,645,859  | 0.984  | 0.963 | 2.62 (1.72-4.00) | $7.17 \times 10^{-6}$ | 2.90 (1.07-7.82)  | 0.04  | 2.66 (1.81-3.93) | $7.31 \times 10^{-7}$ | 0.86 |
| 7 | rs6975452   | T | A | 3,160,511   | 0.559  | 0.504 | 1.25 (1.12-1.40) | $9.59 \times 10^{-5}$ | 1.52 (1.17-1.99)  | 0.002 | 1.29 (1.16-1.43) | $1.64 \times 10^{-6}$ | 0.18 |
| 7 | rs7806494   | A | T | 3,893,629   | 0.766  | 0.723 | 1.36 (1.19-1.56) | $7.41 \times 10^{-6}$ | 1.22 (0.90-1.64)  | 0.20  | 1.34 (1.18-1.51) | $4.06 \times 10^{-6}$ | 0.50 |
| 9 | rs2773871   | G | A | 124,873,393 | 0.836  | 0.802 | 1.39 (1.19-1.62) | $2.26 \times 10^{-5}$ | 1.28 (0.94-1.75)  | 0.12  | 1.37 (1.19-1.57) | $7.35 \times 10^{-6}$ | 0.63 |
| 9 | rs277580    | G | A | 34,771,875  | 0.884  | 0.837 | 1.54 (1.30-1.82) | $4.00 \times 10^{-7}$ | 1.03 (0.70-1.50)  | 0.88  | 1.44 (1.24-1.68) | $2.59 \times 10^{-6}$ | 0.06 |

\* RA, risk allele; PA, protective allele; RAF, risk allele frequency; OR, odds ratio; RAF, risk allele frequency; CI, confidence interval

**Supplementary Table 4** Imputed HLA alleles (A); and SNPs (B) for UK, Spain and Meta-analysis (AF: allele frequency; RAF: risk allele frequency)

A

| Allele      | Alleles conditioned on      | UK Cohort       |                        |                         | Spanish Cohort  |                        |                        | Meta-analysis          |                         | Original results (unconditional meta-analysis) |                        |
|-------------|-----------------------------|-----------------|------------------------|-------------------------|-----------------|------------------------|------------------------|------------------------|-------------------------|------------------------------------------------|------------------------|
|             |                             | AF case/ctrl    | OR (95% CI)            | P                       | AF case/ctrl    | OR (95% CI)            | P                      | OR (95% CI)            | P                       | OR (95% CI)                                    | P                      |
| HLA-B*07:02 | -                           | 0.411/<br>0.141 | 5.34<br>(4.60-6.20)    | $1.09 \times 10^{-106}$ | 0.223/<br>0.078 | 4.38<br>(2.88-6.65)    | $5.18 \times 10^{-12}$ | 5.22<br>(4.53-6.01)    | $9.44 \times 10^{-117}$ | -                                              | -                      |
| HLA-A*33:01 | HLA-B*07:02                 | 0.040/<br>0.006 | 16.17<br>(10.50-24.88) | $1.14 \times 10^{-36}$  | 0.207/<br>0.020 | 28.71<br>(14.83-55.58) | $2.25 \times 10^{-23}$ | 19.19<br>(13.38-27.54) | $6.91 \times 10^{-58}$  | 10.18<br>(7.27-14.24)                          | $1.02 \times 10^{-41}$ |
| HLA-A*11:01 | HLA-B*07:02 and HLA-A*33:01 | 0.142/<br>0.059 | 3.68<br>(3.00-4.52)    | $1.52 \times 10^{-35}$  | 0.140/<br>0.071 | 3.40<br>(1.97-5.87)    | $1.05 \times 10^{-5}$  | 3.64<br>(3.01-4.42)    | $9.28 \times 10^{-40}$  | 2.66<br>(2.25-3.14)                            | $1.90 \times 10^{-30}$ |

B

| SNP         | SNPs conditioned on                   | UK Cohort       |                      |                        | Spanish Cohort  |                     |                        | Meta-analysis        |                        | Original results (unconditional meta-analysis) |                         | Correlated HLA allele* |
|-------------|---------------------------------------|-----------------|----------------------|------------------------|-----------------|---------------------|------------------------|----------------------|------------------------|------------------------------------------------|-------------------------|------------------------|
|             |                                       | RAF case/ctrl   | OR (95% CI)          | P                      | RAF case/ctrl   | OR (95% CI)         | P                      | OR (95% CI)          | P                      | OR (95% CI)                                    | P                       |                        |
| rs2523616   | -                                     | 0.474/<br>0.189 | 2.78<br>(2.47-3.15)  | $5.04 \times 10^{-61}$ | 0.448/<br>0.162 | 3.14<br>(2.33-4.23) | $5.13 \times 10^{-14}$ | 4.73<br>(4.15-5.39)  | $7.6 \times 10^{-119}$ | -                                              | -                       | HLA-B*07               |
| rs62388754  | rs2523616                             | 0.141/<br>0.058 | 3.54<br>(2.90-4.33)  | $5.46 \times 10^{-35}$ | 0.140/<br>0.064 | 3.47<br>(2.09-5.75) | $1.49 \times 10^{-6}$  | 3.53<br>(2.93-4.25)  | $4.54 \times 10^{-40}$ | 2.76<br>(2.33-3.27)                            | $5.06 \times 10^{-32}$  | HLA-A*11:01            |
| rs147324178 | rs2523616 and rs62388754              | 0.417/<br>0.144 | 2.89<br>(2.22-3.75)  | $2.15 \times 10^{-15}$ | 0.238/<br>0.086 | 1.32<br>(0.78-2.25) | 0.2991                 | 2.48<br>(1.96-3.14)  | $3.65 \times 10^{-14}$ | 5.25<br>(4.56-6.04)                            | $5.61 \times 10^{-118}$ | HLA-B*07               |
| rs7749944   | rs2523616, rs62388754 and rs147324178 | 0.040/<br>0.006 | 15.70<br>(9.75-25.3) | $8.51 \times 10^{-30}$ | 0.206/<br>0.021 | 27.7<br>(12.5-61.2) | $2.19 \times 10^{-16}$ | 18.24<br>(12.1-27.4) | $3.18 \times 10^{-44}$ | 10.06<br>(7.20-14.1)                           | $7.92 \times 10^{-42}$  | HLA-A*33:01            |

\* Indicates classical 2- or 4-digit HLA allele in strongest linkage disequilibrium with each SNP ( $R^2$  estimated from SNP/HLA allele dosages based on Pearson correlation across combined UK and Spanish cohorts).

**Supplementary Table 5** Bayesian fine-mapping of the three independent FFA association signals

| <b>Band</b> | <b>Implicated gene</b> | <b>N within 95% CI</b> | <b>Variant with highest posterior probability (<math>V_{\text{Top}}</math>)</b> | <b><math>P_{\text{Causal}}</math> for <math>V_{\text{Top}}</math></b> |
|-------------|------------------------|------------------------|---------------------------------------------------------------------------------|-----------------------------------------------------------------------|
| 2p22.2      | <i>CYP1B1</i>          | 1                      | rs1800440                                                                       | 0.9833                                                                |
| 8q24.22     | <i>ST3GAL1</i>         | 12                     | rs760327                                                                        | 0.6798                                                                |
| 15q26.1     | <i>SEMA4B</i>          | 18                     | rs34560261                                                                      | 0.4262                                                                |

**Supplementary Table 6** Mann-Whitney U test for metabolomic case-control analysis; metabolites with individual  $p < 0.05$  are presented

| Metabolite                                             | Median <sub>cases</sub> | Median <sub>controls</sub> | Z score | P*     |
|--------------------------------------------------------|-------------------------|----------------------------|---------|--------|
| iminodiacetate (IDA)                                   | 1.07                    | 0.96                       | -3.61   | 0.0003 |
| andro steroid monosulfate (1)*                         | 0.55                    | 1.32                       | 3.35    | 0.0008 |
| glucose                                                | 0.97                    | 1.04                       | 3.35    | 0.0008 |
| docosahexaenoate (DHA; 22:6n3)                         | 1.08                    | 0.79                       | -3.17   | 0.002  |
| heme                                                   | 1.18                    | 0.62                       | -3.17   | 0.002  |
| 16a-hydroxy DHEA 3-sulfate                             | 0.74                    | 1.57                       | 2.91    | 0.004  |
| 6-hydroxyindole sulfate                                | 0.93                    | 1.20                       | 2.91    | 0.004  |
| N6-carboxymethyllysine                                 | 0.92                    | 1.23                       | 2.91    | 0.004  |
| p-toluic acid                                          | 0.88                    | 1.14                       | 2.91    | 0.004  |
| 1-stearoyl-2-linoleoyl-GPI (18:0/18:2)                 | 1.09                    | 0.87                       | -2.74   | 0.01   |
| eicosapentaenoate (EPA; 20:5n3)                        | 1.09                    | 0.90                       | -2.74   | 0.01   |
| isoleucylglycine                                       | 1.09                    | 0.79                       | -2.74   | 0.01   |
| S-adenosylhomocysteine (SAH)                           | 1.03                    | 0.84                       | -2.74   | 0.01   |
| 1-oleoyl-2-docosahexaenoyl-GPC (18:1/22:6)*            | 1.06                    | 0.91                       | -2.74   | 0.01   |
| 3-ethylphenylsulfate                                   | 0.14                    | 0.14                       | -2.58   | 0.01   |
| 1-palmityl-2-arachidonoyl-GPC (O-16:0/20:4)*           | 0.94                    | 1.10                       | 2.48    | 0.01   |
| androstenediol (3beta, 17beta) disulfate (2)           | 0.90                    | 1.09                       | 2.48    | 0.01   |
| N-acetylthreonine                                      | 0.93                    | 1.12                       | 2.48    | 0.01   |
| phosphate                                              | 0.99                    | 1.05                       | 2.48    | 0.01   |
| 2-aminophenol sulfate                                  | 1.38                    | 0.91                       | -2.30   | 0.02   |
| allantoin                                              | 1.05                    | 0.94                       | -2.30   | 0.02   |
| cinnamoylglycine                                       | 1.24                    | 0.89                       | -2.30   | 0.02   |
| isoleucylalanine                                       | 1.10                    | 0.86                       | -2.30   | 0.02   |
| linoleate (18:2n6)                                     | 1.07                    | 0.81                       | -2.30   | 0.02   |
| N-palmitoylglycine                                     | 1.06                    | 0.93                       | -2.30   | 0.02   |
| 1-linoleoylglycerol (18:2)                             | 1.20                    | 0.87                       | -2.30   | 0.02   |
| oleate/vaccenate (18:1)                                | 1.16                    | 0.90                       | -2.30   | 0.02   |
| stearoyl ethanolamide                                  | 1.07                    | 0.96                       | -2.30   | 0.02   |
| 1-(1-enyl-palmitoyl)-2-arachidonoyl-GPC (P-16:0/20:4)* | 0.98                    | 1.08                       | 2.04    | 0.04   |
| 2-arachidonoyl-GPE* (20:4)*                            | 0.50                    | 0.83                       | 2.04    | 0.04   |
| 21-hydroxypregnenolone disulfate                       | 0.88                    | 1.24                       | 2.04    | 0.04   |
| 3-indoxyl sulfate                                      | 0.89                    | 1.17                       | 2.04    | 0.04   |
| alanine                                                | 0.96                    | 1.06                       | 2.04    | 0.04   |
| 1-arachidonoyl-GPE* (20:4)*                            | 0.90                    | 1.04                       | 2.04    | 0.04   |
| cortisol                                               | 0.94                    | 1.12                       | 2.04    | 0.04   |
| ethylmalonate                                          | 0.89                    | 1.16                       | 2.04    | 0.04   |
| gamma-carboxyglutamate                                 | 0.99                    | 1.11                       | 2.04    | 0.04   |
| homocitrulline                                         | 0.89                    | 1.19                       | 2.04    | 0.04   |
| inosine                                                | 0.84                    | 1.11                       | 2.04    | 0.04   |

|                                        |      |      |      |      |
|----------------------------------------|------|------|------|------|
| N1-methylinosine                       | 0.95 | 1.07 | 2.04 | 0.04 |
| oleamide                               | 0.87 | 1.27 | 2.04 | 0.04 |
| p-cresol-glucuronide*                  | 0.73 | 1.14 | 2.04 | 0.04 |
| phenylalanine                          | 0.99 | 1.06 | 2.04 | 0.04 |
| pregnenolone sulfate                   | 0.88 | 1.24 | 2.04 | 0.04 |
| sucrose                                | 0.90 | 1.46 | 2.04 | 0.04 |
| taurocholenate sulfate                 | 0.94 | 1.17 | 2.04 | 0.04 |
| 21-hydroxypregnenolone monosulfate (1) | 0.50 | 0.50 | 2.00 | 0.05 |

\*Bonferroni-adjusted values not displayed as none <0.05

**Supplementary Table 7** Numbers of differentially Expressed Genes (DEGs) between cases and controls

|                                                                       |     |
|-----------------------------------------------------------------------|-----|
| Differentially Expressed Genes with FDR $\leq$ 0.05:                  | 327 |
| Differentially Expressed Genes with FDR $\leq$ 0.05 & LFC $\geq$ 1:   | 120 |
| Differentially Expressed Genes UP FDR $\leq$ 0.05 &  LFC  $\geq$ 1:   | 83  |
| Differentially Expressed Genes DOWN FDR $\leq$ 0.05 &  LFC  $\geq$ 1: | 37  |

\* LFC = log fold change; FDR = false discovery rate



**Supplementary Table 8** Upregulated significantly differentially expressed genes (DEGs) between FFA cases and controls (FDR  $\leq$  0.05 & |LFC|  $\geq$  1) \*

| Genes   | logFC | logCPM | LR    | p value                | FDR                   |
|---------|-------|--------|-------|------------------------|-----------------------|
| CXCL9   | 2.98  | 5.17   | 51.42 | 7.45x10 <sup>-13</sup> | 9.70x10 <sup>-9</sup> |
| GBP5    | 1.97  | 4.44   | 35.3  | 2.83x10 <sup>-9</sup>  | 1.84x10 <sup>-5</sup> |
| PSMB9   | 1.14  | 4.8    | 32.11 | 1.46x10 <sup>-8</sup>  | 6.34x10 <sup>-5</sup> |
| IFI27   | 1.41  | 5.79   | 29.54 | 5.48x10 <sup>-8</sup>  | 1.25x10 <sup>-4</sup> |
| ITGAL   | 1.71  | 4.09   | 28.21 | 1.09x10 <sup>-7</sup>  | 1.63x10 <sup>-4</sup> |
| PTGDS   | 1.82  | 4.88   | 27.49 | 1.58x10 <sup>-7</sup>  | 1.94x10 <sup>-4</sup> |
| GBP4    | 1.41  | 5.65   | 27.41 | 1.64x10 <sup>-7</sup>  | 1.94x10 <sup>-4</sup> |
| LCP2    | 1.43  | 3.87   | 26.95 | 2.09x10 <sup>-7</sup>  | 2.27x10 <sup>-4</sup> |
| C2      | 1.17  | 4.42   | 26.04 | 3.35x10 <sup>-7</sup>  | 2.91x10 <sup>-4</sup> |
| MYO1G   | 1.3   | 3.6    | 25.02 | 5.66x10 <sup>-7</sup>  | 4.10x10 <sup>-4</sup> |
| OAS2    | 1.51  | 4.61   | 24.3  | 8.25x10 <sup>-7</sup>  | 5.38x10 <sup>-4</sup> |
| LPXN    | 1.17  | 3.97   | 24.12 | 9.07x10 <sup>-7</sup>  | 5.63x10 <sup>-4</sup> |
| PARP14  | 1.01  | 7.48   | 23.96 | 9.83x10 <sup>-7</sup>  | 5.82x10 <sup>-4</sup> |
| EPST11  | 1.65  | 4.14   | 23.63 | 1.17x10 <sup>-6</sup>  | 6.34x10 <sup>-4</sup> |
| IKZF3   | 1.78  | 4.4    | 23.13 | 1.51x10 <sup>-6</sup>  | 7.59x10 <sup>-4</sup> |
| ITGB2   | 1.36  | 6.12   | 22.78 | 1.82x10 <sup>-6</sup>  | 8.77x10 <sup>-4</sup> |
| SASH3   | 1.71  | 3.86   | 22.44 | 2.17x10 <sup>-6</sup>  | 9.73x10 <sup>-4</sup> |
| CD74    | 1.05  | 9.12   | 21.85 | 2.95x10 <sup>-6</sup>  | 1.20x10 <sup>-3</sup> |
| IGLL5   | 2.95  | 3.77   | 21.66 | 3.25x10 <sup>-6</sup>  | 1.25x10 <sup>-3</sup> |
| PTPRCAP | 1.47  | 3.62   | 21.44 | 3.65x10 <sup>-6</sup>  | 1.33x10 <sup>-3</sup> |
| APOL1   | 1.1   | 4.21   | 21.43 | 3.68x10 <sup>-6</sup>  | 1.33x10 <sup>-3</sup> |
| RNASE6  | 1.15  | 3.28   | 21.37 | 3.79x10 <sup>-6</sup>  | 1.34x10 <sup>-3</sup> |
| GVINP1  | 1.23  | 4.46   | 21.2  | 4.14x10 <sup>-6</sup>  | 1.39x10 <sup>-3</sup> |
| FPR3    | 1.14  | 4.75   | 21.18 | 4.17x10 <sup>-6</sup>  | 1.39x10 <sup>-3</sup> |
| CD53    | 1.22  | 4.34   | 20.88 | 4.90x10 <sup>-6</sup>  | 1.49x10 <sup>-3</sup> |
| GPRIN3  | 1.11  | 4.3    | 20.12 | 7.26x10 <sup>-6</sup>  | 1.89x10 <sup>-3</sup> |
| JCHAIN  | 2.08  | 4.1    | 19.22 | 1.17x10 <sup>-5</sup>  | 2.53x10 <sup>-3</sup> |
| PTPRC   | 1.16  | 6.47   | 18.92 | 1.36x10 <sup>-5</sup>  | 2.82x10 <sup>-3</sup> |
| LYZ     | 1.26  | 5.79   | 18.11 | 2.08x10 <sup>-5</sup>  | 3.71x10 <sup>-3</sup> |
| LGALS9  | 1.03  | 3.12   | 18.17 | 2.02x10 <sup>-5</sup>  | 3.71x10 <sup>-3</sup> |
| MMP9    | 2.47  | 5.26   | 18.01 | 2.20x10 <sup>-5</sup>  | 3.72x10 <sup>-3</sup> |
| PARVG   | 1.3   | 3.41   | 18.03 | 2.17x10 <sup>-5</sup>  | 3.72x10 <sup>-3</sup> |
| TYROBP  | 1     | 4.01   | 18.03 | 2.17x10 <sup>-5</sup>  | 3.72x10 <sup>-3</sup> |
| SPOCK2  | 1.33  | 4.54   | 17.59 | 2.74x10 <sup>-5</sup>  | 4.46x10 <sup>-3</sup> |
| IRF1    | 1.23  | 5.67   | 17.61 | 2.71x10 <sup>-5</sup>  | 4.46x10 <sup>-3</sup> |
| ITGAX   | 1.37  | 4.05   | 17.42 | 3.00x10 <sup>-5</sup>  | 4.73x10 <sup>-3</sup> |
| MX1     | 1.13  | 5.75   | 17.41 | 3.02 x10 <sup>-5</sup> | 4.73x10 <sup>-3</sup> |
| NCKAP1L | 1     | 5.48   | 17.32 | 3.15x10 <sup>-5</sup>  | 4.78x10 <sup>-3</sup> |
| FYB     | 1.19  | 5.03   | 17.04 | 3.66x10 <sup>-5</sup>  | 5.36x10 <sup>-3</sup> |

|          |      |      |       |                        |                        |
|----------|------|------|-------|------------------------|------------------------|
| VAV1     | 1.05 | 3.78 | 16.86 | 4.02x10 <sup>-5</sup>  | 5.46x10 <sup>-3</sup>  |
| HCLS1    | 1.05 | 5.09 | 16.87 | 4.01x10 <sup>-5</sup>  | 5.46x10 <sup>-3</sup>  |
| DOCK2    | 1.02 | 5.76 | 16.88 | 3.98x10 <sup>-5</sup>  | 5.46x10 <sup>-3</sup>  |
| ZIC1     | 1.74 | 3.37 | 16.81 | 4.14x10 <sup>-5</sup>  | 5.56x10 <sup>-3</sup>  |
| IL7R     | 1.59 | 4.96 | 16.7  | 4.38x10 <sup>-5</sup>  | 5.65x10 <sup>-3</sup>  |
| ADAM28   | 1.27 | 3.9  | 16.71 | 4.36x10 <sup>-5</sup>  | 5.65x10 <sup>-3</sup>  |
| CCL19    | 1.39 | 4.88 | 16.57 | 4.69x10 <sup>-5</sup>  | 5.92x10 <sup>-3</sup>  |
| TRAF1    | 1.01 | 4.57 | 16.38 | 5.19x10 <sup>-5</sup>  | 6.44x10 <sup>-3</sup>  |
| APOBEC3G | 1.21 | 3.31 | 16.25 | 5.56x10 <sup>-5</sup>  | 6.68x10 <sup>-3</sup>  |
| CORO1A   | 1.21 | 4.95 | 16.27 | 5.48x10 <sup>-5</sup>  | 6.68x10 <sup>-3</sup>  |
| IRF8     | 1.29 | 4.52 | 16.08 | 6.09x10 <sup>-5</sup>  | 7.15x10 <sup>-3</sup>  |
| CD84     | 1.05 | 5.14 | 16.05 | 6.17x10 <sup>-5</sup>  | 7.15x10 <sup>-3</sup>  |
| IL2RG    | 1.53 | 3.02 | 16.02 | 6.28x10 <sup>-5</sup>  | 7.18 x10 <sup>-3</sup> |
| SPP1     | 2.23 | 5.08 | 15.87 | 6.79 x10 <sup>-5</sup> | 7.59x10 <sup>-3</sup>  |
| TRAF3IP3 | 1.14 | 3.33 | 15.83 | 6.93x10 <sup>-5</sup>  | 7.59x10 <sup>-3</sup>  |
| JAK3     | 1.43 | 3.48 | 15.54 | 8.06x10 <sup>-5</sup>  | 8.40x10 <sup>-3</sup>  |
| LAPTM5   | 1.24 | 5.69 | 15.39 | 8.73x10 <sup>-5</sup>  | 8.70x10 <sup>-3</sup>  |
| PLAU     | 1.03 | 4.52 | 15.17 | 9.83x10 <sup>-5</sup>  | 9.42x10 <sup>-3</sup>  |
| CLEC10A  | 1.02 | 4.47 | 15.18 | 9.78x10 <sup>-5</sup>  | 9.42x10 <sup>-3</sup>  |
| SPN      | 1.01 | 4.42 | 15.07 | 1.04x10 <sup>-4</sup>  | 9.59x10 <sup>-3</sup>  |
| CYTH4    | 1.04 | 4.17 | 15.05 | 1.05x10 <sup>-4</sup>  | 9.60x10 <sup>-3</sup>  |
| SP140    | 1.22 | 3.24 | 14.98 | 1.09x10 <sup>-4</sup>  | 9.92x10 <sup>-3</sup>  |
| TFEC     | 1.15 | 3.3  | 14.92 | 1.12x10 <sup>-4</sup>  | 1.01x10 <sup>-3</sup>  |
| WDFY4    | 1.22 | 5.56 | 14.85 | 1.17x10 <sup>-4</sup>  | 1.03x10 <sup>-3</sup>  |
| IKZF1    | 1.17 | 4.53 | 14.64 | 1.30x10 <sup>-4</sup>  | 1.10x10 <sup>-3</sup>  |
| ITK      | 1.29 | 3.6  | 13.97 | 1.86x10 <sup>-4</sup>  | 1.43x10 <sup>-3</sup>  |
| CMPK2    | 1.1  | 2.92 | 13.98 | 1.85x10 <sup>-4</sup>  | 1.43 x10 <sup>-3</sup> |
| IFI30    | 1.16 | 5.4  | 13.94 | 1.88 x10 <sup>-4</sup> | 1.44 x10 <sup>-3</sup> |
| SELE     | 1.57 | 3.87 | 13.61 | 2.25x10 <sup>-4</sup>  | 1.59x10 <sup>-3</sup>  |
| PLEK     | 1.13 | 4.73 | 13.57 | 2.29x10 <sup>-4</sup>  | 1.61x10 <sup>-2</sup>  |
| PLCB2    | 1.19 | 3.74 | 13.42 | 2.49x10 <sup>-4</sup>  | 1.73x10 <sup>-2</sup>  |
| KLHL6    | 1.19 | 3.42 | 13.33 | 2.61x10 <sup>-4</sup>  | 1.79x10 <sup>-2</sup>  |
| SLAMF8   | 1.1  | 3.03 | 13.07 | 3.00x10 <sup>-4</sup>  | 1.95x10 <sup>-2</sup>  |
| SELPLG   | 1    | 4.13 | 13.04 | 3.05x10 <sup>-4</sup>  | 1.97x10 <sup>-2</sup>  |
| JAML     | 1.01 | 4.39 | 12.97 | 3.17x10 <sup>-4</sup>  | 2.02x10 <sup>-2</sup>  |
| CD83     | 1.13 | 4.41 | 12.2  | 4.79x10 <sup>-4</sup>  | 2.68x10 <sup>-2</sup>  |
| RAC2     | 1.08 | 3.74 | 11.95 | 5.45x10 <sup>-4</sup>  | 2.91x10 <sup>-2</sup>  |
| CCL2     | 1.16 | 3.89 | 11.42 | 7.27x10 <sup>-4</sup>  | 3.53x10 <sup>-2</sup>  |
| TYMP     | 1.08 | 5.96 | 11.15 | 8.41x10 <sup>-4</sup>  | 3.97 x10 <sup>-2</sup> |
| HAPLN3   | 1.1  | 3.7  | 10.46 | 1.22x10 <sup>-4</sup>  | 4.88 x10 <sup>-2</sup> |

\* logFC = log fold change; logCPM = log counts per million; LR = likelihood ratio; P value = unadjusted p-value; FDR = FDR (false discovery rate)-adjusted p value

**Supplementary Table 9** Downregulated differentially expressed genes between FFA cases and healthy controls (FDR  $\leq 0.05$  &  $|LFC| \geq 1$ ) \*

| Genes   | logFC | logCPM | LR    | P                     | FDR                    |
|---------|-------|--------|-------|-----------------------|------------------------|
| HSD3B1  | -3.12 | 4.66   | 29.45 | 5.74x10 <sup>-8</sup> | 1.25x10 <sup>-4</sup>  |
| HAO2    | -3.00 | 3.79   | 22.28 | 2.36x10 <sup>-6</sup> | 9.93 x10 <sup>-4</sup> |
| FAR2    | -1.86 | 6.84   | 20.87 | 4.9x10 <sup>-6</sup>  | 1.49x10 <sup>-3</sup>  |
| MOGAT2  | -2.42 | 3.60   | 20.88 | 4.91x10 <sup>-6</sup> | 1.49x10 <sup>-3</sup>  |
| DGAT2L6 | -2.80 | 5.41   | 20.13 | 7.24x10 <sup>-6</sup> | 1.89x10 <sup>-3</sup>  |
| CYP4F8  | -3.30 | 5.05   | 19.99 | 7.8x10 <sup>-6</sup>  | 1.96x10 <sup>-3</sup>  |
| AWAT2   | -3.11 | 5.82   | 19.58 | 9.67x10 <sup>-6</sup> | 2.33x10 <sup>-3</sup>  |
| PDZK1   | -1.82 | 4.29   | 19.29 | 1.12x10 <sup>-5</sup> | 2.52x10 <sup>-3</sup>  |
| FADS2   | -2.69 | 9.01   | 18.73 | 1.5x10 <sup>-5</sup>  | 2.97x10 <sup>-3</sup>  |
| AADACL3 | -3.11 | 7.44   | 18.18 | 2.01x10 <sup>-5</sup> | 3.71x10 <sup>-3</sup>  |
| CDKL2   | -1.34 | 2.57   | 18.08 | 2.11x10 <sup>-5</sup> | 3.72x10 <sup>-3</sup>  |
| AWAT1   | -2.51 | 4.44   | 16.97 | 3.8x10 <sup>-5</sup>  | 5.46x10 <sup>-3</sup>  |
| PM20D1  | -2.83 | 6.83   | 16.89 | 3.95x10 <sup>-5</sup> | 5.46x10 <sup>-3</sup>  |
| PNLDC1  | -2.37 | 3.12   | 16.55 | 4.73x10 <sup>-5</sup> | 5.92x10 <sup>-3</sup>  |
| PDK4    | -1.05 | 7.15   | 16.04 | 6.2x10 <sup>-5</sup>  | 7.15x10 <sup>-3</sup>  |
| MSMO1   | -1.08 | 7.06   | 15.50 | 8.23x10 <sup>-5</sup> | 8.52x10 <sup>-3</sup>  |
| SEC14L6 | -2.51 | 6.18   | 15.14 | 9.99x10 <sup>-5</sup> | 9.42x10 <sup>-3</sup>  |
| TMEM56  | -1.34 | 6.09   | 14.92 | 1.12x10 <sup>-4</sup> | 1.01x10 <sup>-2</sup>  |
| SEC14L4 | -1.98 | 3.00   | 14.78 | 1.21x10 <sup>-4</sup> | 1.06x10 <sup>-2</sup>  |
| ACSBG1  | -2.08 | 7.07   | 14.58 | 1.34x10 <sup>-4</sup> | 1.13x10 <sup>-2</sup>  |
| HSD11B1 | -1.11 | 4.84   | 14.39 | 1.48x10 <sup>-4</sup> | 1.21x10 <sup>-2</sup>  |
| FADS1   | -1.98 | 7.31   | 14.22 | 1.63x10 <sup>-4</sup> | 1.32x10 <sup>-2</sup>  |
| INSIG1  | -1.12 | 7.34   | 13.84 | 1.99x10 <sup>-4</sup> | 1.49x10 <sup>-2</sup>  |
| TMEM97  | -1.05 | 5.65   | 13.69 | 2.16x10 <sup>-4</sup> | 1.58x10 <sup>-2</sup>  |
| KRT79   | -2.01 | 8.63   | 13.62 | 2.23x10 <sup>-4</sup> | 1.59x10 <sup>-2</sup>  |
| GLDC    | -2.68 | 4.81   | 13.16 | 2.86x10 <sup>-4</sup> | 1.90x10 <sup>-2</sup>  |
| ELOVL3  | -1.60 | 6.74   | 12.44 | 4.20x10 <sup>-4</sup> | 2.47x10 <sup>-2</sup>  |
| PDE6A   | -1.92 | 3.51   | 12.23 | 4.71x10 <sup>-4</sup> | 2.65x10 <sup>-2</sup>  |
| GABRA4  | -1.57 | 3.93   | 11.48 | 7.04x10 <sup>-4</sup> | 3.50x10 <sup>-2</sup>  |
| ACSM3   | -1.16 | 4.11   | 11.36 | 7.50x10 <sup>-4</sup> | 3.62x10 <sup>-2</sup>  |
| THRIL   | -1.00 | 4.35   | 11.31 | 7.70x10 <sup>-4</sup> | 3.70x10 <sup>-2</sup>  |
| GAL     | -2.16 | 3.64   | 11.11 | 8.58x10 <sup>-4</sup> | 4.01x10 <sup>-2</sup>  |
| ROS1    | -1.94 | 4.37   | 10.93 | 9.45x10 <sup>-4</sup> | 4.18x10 <sup>-2</sup>  |
| SOAT1   | -1.19 | 7.52   | 10.75 | 1.04x10 <sup>-3</sup> | 4.54x10 <sup>-2</sup>  |
| PNPLA5  | -2.25 | 4.35   | 10.71 | 1.07x10 <sup>-3</sup> | 4.60x10 <sup>-2</sup>  |
| ALOX15B | -2.22 | 7.25   | 10.62 | 1.12x10 <sup>-3</sup> | 4.67x10 <sup>-2</sup>  |
| TMEM91  | -1.11 | 5.11   | 10.43 | 1.24x10 <sup>-3</sup> | 4.95x10 <sup>-2</sup>  |

\* logFC = log fold change; logCPM = log counts per million; LR = likelihood ratio; P value = unadjusted p-value; FDR = FDR (false discovery rate)-adjusted p value

**Supplementary Table 10** Gene-set enrichment analysis (GSEA) for GO pathways: upregulated gene sets ranked by significance (p<0.05, q<0.05)

| GO Term                                               | Immune gene set description                                                                  | p     | q     |
|-------------------------------------------------------|----------------------------------------------------------------------------------------------|-------|-------|
| REACTOME IMMUNE SYSTEM (M1045)                        | Genes involved in innate immune response                                                     | 0.004 | 0.019 |
| NABA MATRISOME (M5889)                                | Ensemble of genes encoding extracellular matrix and extracellular matrix-associated proteins | 0.016 | 0.037 |
| REACTOME CYTOKINE SIGNALLING IN IMMUNE SYSTEM (M1060) | Genes involved in cytokine signalling in immune system                                       | 0.022 | 0.037 |

**Supplementary Table 11** Gene-set enrichment analysis (GSEA) for GO terms: upregulated gene sets ranked by significance (p<0.05, q<0.05)

| GO Term                            | Immune gene set description                                                                                                                                          | p                     | q     |
|------------------------------------|----------------------------------------------------------------------------------------------------------------------------------------------------------------------|-----------------------|-------|
| IMMUNE SYSTEM PROCESS (GO:0002376) | Any process involved in the development or functioning of the immune system, an organismal system for calibrated responses to potential internal or invasive threats | $8.72 \times 10^{-5}$ | 0.011 |
| IMMUNE RESPONSE (GO:0006955)       | Any immune system process that functions in the calibrated response of an organism to a potential internal or invasive threat                                        | $3.73 \times 10^{-4}$ | 0.026 |

**Supplementary Table 12** Gene-set enrichment analysis (GSEA) for GO terms: downregulated gene sets ranked by significance (p<0.05, q<0.05)

| GO Term                                                       | p      | q     |
|---------------------------------------------------------------|--------|-------|
| LIPID METABOLIC PROCESS                                       | 0.0006 | 0.032 |
| OXIDATION REDUCTION PROCESS                                   | 0.001  | 0.032 |
| OXIDOREDUCTASE ACTIVITY                                       | 0.001  | 0.032 |
| ENDOPLASMIC RETICULUM PART                                    | 0.001  | 0.032 |
| NUCLEAR OUTER MEMBRANE ENDOPLASMIC RETICULUM MEMBRANE NETWORK | 0.001  | 0.032 |
| CELLULAR LIPID METABOLIC PROCESS                              | 0.001  | 0.032 |
| ENDOPLASMIC RETICULUM                                         | 0.002  | 0.046 |
| MONOCARBOXYLIC ACID METABOLIC PROCESS                         | 0.002  | 0.046 |

## References

1. Fertig, R., Tosti, A. Frontal fibrosing alopecia treatment options. *Intractable Rare Dis. Res.* **5**, 314-315 (2016).
2. Tziotzios, C., Stefanato, C.M., Fenton, D.A., Simpson, M.A., McGrath, J.A. Frontal fibrosing alopecia: reflections and hypotheses on aetiology and pathogenesis. *Exp. Dermatol.* **25**, 847-885 (2016).
3. Seegobin, S.D., Tziotzios, C., Stefanato, C.M., Bhargava, K., Fenton, D.A., McGrath, J.A. Frontal fibrosing alopecia: there is no statistically significant association with leave-on facial skin care products and sunscreens. *Br. J. Dermatol.* **175**, 1407-1408 (2016).
4. Tolkachjov, S.N., Chaudhry, H.M., Camilleri M.J., Torgerson RR. Frontal fibrosing alopecia among men: a clinicopathologic study of 7 cases. *J. Am. Acad. Dermatol.* **77**, 683-690 (2017).
5. Lobato-Berezo, A., March-Rodríguez, A., Deza, G., Bertolín-Colilla, M., Pujol, R.M. Frontal fibrosing alopecia after antiandrogen hormonal therapy in a male patient. *J. Eur. Acad. Dermatol. Venereol.* **32**, e291-292 (2018).
